# Supplementary material for: Validation of the WRF-ARW eclipse model with measurements from the 2019 and 2020 total solar eclipses
Source: Copernicus journal article supplement (doi:10.5194/amt-16-5167-2023), 2023-11-03
Supplement: Supplementary file 2 [file amt-16-5167-2023-supplement.zip]

Archive with 5 entries (5 files):
- S3.pdf
- S4.pdf
- S2.pdf
- S1.pdf
- amt-16-5167-2023-supplement-title-page.pdf
