# Supplementary material for: Validation of the WRF-ARW eclipse model with measurements from the 2019 and 2020 total solar eclipses
Source: Copernicus journal article supplement (doi:10.5194/amt-16-5167-2023), 2023-11-03
Supplement: Supplementary file 2 [file amt-16-5167-2023-supplement.zip › amt-16-5167-2023-supplement-title-page.pdf]

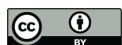

## *Supplement of*

# **Validation of the WRF-ARW eclipse model with measurements from the 2019 and 2020 total solar eclipses**

**Carl E. Spangrude et al.**

*Correspondence to:* Carl E. Spangrude (cspangrude@esri.com)

- amt-16-5167-2023-supplement-title-page.pdf
- S1.pdf
- S2.pdf
- S3.pdf
- S4.pdf

The copyright of individual parts of the supplement might differ from the article licence.
