# Supplementary material for: Validation of the WRF-ARW eclipse model with measurements from the 2019 and 2020 total solar eclipses
Source: Copernicus journal article supplement (doi:10.5194/amt-16-5167-2023), 2023-11-03
Supplement: Supplementary file 2 [file amt-16-5167-2023-supplement.zip › S2.pdf]

```
&share
  wrf_core = 'ARW',
  max_dom = 3,
  start_date =
'2019-07-02_00:00:00','2019-07-02_00:00:00','2019-07-02_00:00:00',
  end_date =
'2019-07-04_00:00:00','2019-07-04_00:00:00','2019-07-04_00:00:00',
  interval_seconds = 10800
/
```

```
&geogrid
  geog_data_res = 'default','default','default'
  geog_data_path = '/Build_WRF/WPS_GEOG'
  parent_id = 1, 1, 2
  parent_grid_ratio = 1, 3, 3
  i_parent_start = 1, 86, 86
  j_parent_start = 1, 86, 86
  e_we = 253, 253, 253
  e_sn = 253, 253, 253
  map_proj = 'lambert'
  dx = 9000.0
  dy = 9000.0
  ref_lon = -70.88042601698102
  ref_lat = -30.35303012864112
  truelat1 = -25.0
  truelat2 = -30.0
  stand_lon = -65.0
/
```

```
&ungrib
  out_format = 'WPS',
  prefix = 'FILE',
/
```

```
&metgrid
  fg_name = 'FILE'
/
```
